# Supplementary material for: Generative Artificial Intelligence to Transform Inpatient Discharge Summaries to Patient-Friendly Language and Format
Source: PubMed Central journal article supplement (PMC10928500; doi:10.1001/jamanetworkopen.2024.0357), 2024-03-11
Supplement: jamanetwopen-e240357-s002.pdf [file jamanetwopen-e240357-s002.pdf]

## Data Sharing Statement

Zaretsky. Generative Artificial Intelligence to Transform Inpatient Discharge Summaries to Patient-Friendly Language and Format. *JAMA Netw Open*. Published March 11, 2024. doi:10.1001/jamanetworkopen.2024.0357

### Data

**Data available:** No

### Additional Information

**Explanation for why data not available:** This is for quality improvement purposes
